# Supplementary material for: Dissipation Kinetics and Safety Evaluation of Flonicamid in Four Various Types of Crops
Source: MDPI journal article supplement (doi:10.3390/molecules27238615), 2022-12-06
Supplement: s1 [file s1]

Table S1. Purification combination and dosage of PSA and MgSO<sub>4</sub> in 4 typical matrices

| Sample     | Weight (g) | NaCl+MgSO <sub>4</sub> (g) | PSA+ MgSO <sub>4</sub> (mg) |
|------------|------------|----------------------------|-----------------------------|
| Peach      | 10         | 3 + 2                      | 100 + 100                   |
|            |            |                            | 150 + 50                    |
|            |            |                            | 50 + 150                    |
| Cucumber   | 10         | 3 + 2                      | 100 + 100                   |
|            |            |                            | 150 + 50                    |
|            |            |                            | 50 + 150                    |
| Cabbage    | 10         | 1 + 4                      | 100 + 100                   |
|            |            |                            | 150 + 50                    |
|            |            |                            | 50 + 150                    |
| Cottonseed | 5          | 1 + 4                      | 100 + 100                   |
|            |            |                            | 150 + 50                    |
|            |            |                            | 50 + 150                    |

Table S2. Gradient elution program

| Time<br>(min) | Flow rate<br>(mL/min) | Mobile phase (%)        |          |
|---------------|-----------------------|-------------------------|----------|
|               |                       | 0.05% Formic acid water | Methanol |
| 0.00          | 0.30                  | 90                      | 10       |
| 2.50          | 0.30                  | 10                      | 90       |
| 3.50          | 0.30                  | 10                      | 90       |
| 3.51          | 0.30                  | 90                      | 10       |
| 5.00          | 0.30                  | 90                      | 10       |

Table s3. Field test sites, crop varieties and test types

| Crop types | Test address                                            | Abbreviation of test sites | Crop varieties   | Test types                                |
|------------|---------------------------------------------------------|----------------------------|------------------|-------------------------------------------|
| Peach      | Xincheng District, Hohhot City, Inner Mongolia Province | Inner Mongolia             | Youpan           | Terminal residue                          |
|            | Xincheng District, Hohhot City, Inner Mongolia Province | Inner Mongolia             | Youpan           | Terminal residue                          |
|            | Yuci District, Jinzhong City, Shanxi Province           | Shanxi                     | Okubo            | Terminal residue                          |
|            | Sujiatuo Town, Haidian District, Beijing Province       | Beijing                    | Xinchuanzhongdao | Residual dissipation and terminal residue |
|            | Daiyue District, Tai'an City, Shandong Province         | Shandong                   | Kangfang         | Residual dissipation and terminal residue |
|            | Gongyi City, Zhengzhou City, Henan Province             | Henan                      | Zhongyou5        | Residual dissipation and terminal residue |
|            | Changshu City, Suzhou City, Jiangsu Province            | Jiangsu                    | Jingchun         | Terminal residue                          |
|            | Huanghua Town, Changsha City, Hunan Province            | Hunan                      | Cuimi            | Residual dissipation and terminal residue |
| Cucumber   | Huaxi Town, Guiyang City, Guizhou Province              | Guizhou                    | Cuimi            | Terminal residue                          |
|            | Taizihe District, Liaoyang City, Liaoning Province      | Liaoning                   | Lvrou            | Residual dissipation and terminal residue |
|            | Saihan District, Hohhot City, Inner Mongolia Province   | Inner Mongolia             | Shuika           | Terminal residue                          |
|            | Weiyang District, Xian City, Shanxi Province            | Shanxi                     | Dinghao          | Terminal residue                          |
|            | Panggezhuang Town, Daxing District, Beijing             | Beijing                    | Zhongnong26      | Residual dissipation and terminal residue |
|            | Taishan District, Tai'An City, Shandong Province        | Shandong                   | Mingxing1        | Residual dissipation and terminal residue |
|            | Gongyi City, Zhengzhou City, Henan Province             | Henan                      | Jinyou1          | Terminal residue                          |
|            | Laixi City, Qingdao City, Shandong Province             | Shandong                   | Xiafeng1         | Terminal residue                          |
|            | Chaohu City, Hefei City, Anhui Province                 | Anhui                      | Jingyan4         | Terminal residue                          |
|            | Xinbang Town, Songjiang District, Shanghai Province     | Shanghai                   | Heiliangwang     | Terminal residue                          |
|            | Chunhua Town, Changsha City, Hunan Province             | Hunan                      | Xiangjin4        | Terminal residue                          |
|            | Shibei Town, Zhongxiang City, Hubei Province            | Hubei                      | Bendiwang        | Terminal residue                          |
| cabbage    | Huaxi District, Guiyang City, Guizhou Province          | Guizhou                    | Zhongnong8       | Residual dissipation and terminal residue |
|            | Weiyang District, Xian City, Shanxi Province            | Shanxi                     | Zhonggan22       | Terminal residue                          |
|            | Baishan Town, Changning District, Beijing               | Beijing                    | Zhonggan21       | Residual dissipation and terminal residue |

| Crop    | Test address                                         | Abbreviation of test sites | Crop varieties   | Test types                                |
|---------|------------------------------------------------------|----------------------------|------------------|-------------------------------------------|
| cabbage | Taishan District, Tai'An City, Shandong Province     | Shandong                   | Shenglv168       | Terminal residue                          |
|         | Zhongmou City, Zhengzhou City, Henan Province        | Henan                      | Yafeilili        | Terminal residue                          |
|         | Luyang District, Hefei City, Anhui Province          | Anhui                      | Dongfeng         | Terminal residue                          |
|         | Xinbang Town, Songjiang District, Shanghai Province  | Shanghai                   | Chunfeng508      | Residual dissipation and terminal residue |
|         | Chunhua Town, Changsha City, Hunan Province          | Hunan                      | Zhonggan19       | Residual dissipation and terminal residue |
|         | Duchang City, Jiujiang City, Jiangxi Province        | Jiangxi                    | Xialian          | Terminal residue                          |
|         | Xixiangtang District, Nanning City, Guangxi Province | Guangxi                    | Bianqiu          | Terminal residue                          |
|         | Longlin City, Baise City, Guangxi Province           | Chongqing                  | Zhonggan21       | Terminal residue                          |
|         | Huaxi District, Guizhou City, Guizhou Province       | Guizhou                    | Qiangnan1        | Terminal residue                          |
| Cotton  | Gaoming District, Foshan City, Guangdong Province    | Guangdong                  | Zhonggan21       | Residual dissipation and terminal residue |
|         | Quzhou City, Handan City, Hebei Province             | Hebei                      | Huamian5         | Residual dissipation and terminal residue |
|         | Daiyue District, Tai'An City, Shandong Province      | Shandong                   | Lanhan           | Residual dissipation and terminal residue |
|         | Pingyuan District, Xinxiang City, Henan Province     | Henan                      | Tianshanshengxue | Residual dissipation and terminal residue |
|         | Chaohu City, Hefei City, Anhui Province              | Anhui                      | Quanyinmian3     | Terminal residue                          |
|         | Yong'an Town, Liuyang City, Hunan Province           | Hunan                      | Xipu818          | Terminal residue                          |
|         | Duchang City, Jiujiang City, Jiangxi Province        | Jiangxi                    | Eza10            | Terminal residue                          |
|         | Shangzhuang Town, Haidian District, Beijing          | Beijing                    | Huamian5         | Terminal residue                          |
|         | Shibei Town, Zhongxiang City, Hubei Province         | Hubei                      | Tianshanshengxue | Residual dissipation and terminal residue |
